# Supplementary material for: Land-Use Intensity Rather Than Plant Functional Identity Shapes Bacterial and Fungal Rhizosphere Communities
Source: PubMed Central journal article supplement (PMC6255942; doi:10.3389/fmicb.2018.02711), 2018-11-20
Supplement: Data_Sheet_1.pdf [file Data_Sheet_1.pdf]

## Supplementary Material

# Land-use intensity rather than plant functional identity shapes bacterial and fungal rhizosphere communities

Ricardo Schöps\*, Kezia Goldmann, Katharina Herz, Guillaume Lentendu, Ingo Schöning, Helge Bruelheide, Tesfaye Wubet, François Buscot

\* Correspondence: Ricardo Schöps: ricardo.schoeps@ufz.de

### 1 Supplementary Data

#### 1.1 Supplementary Figures

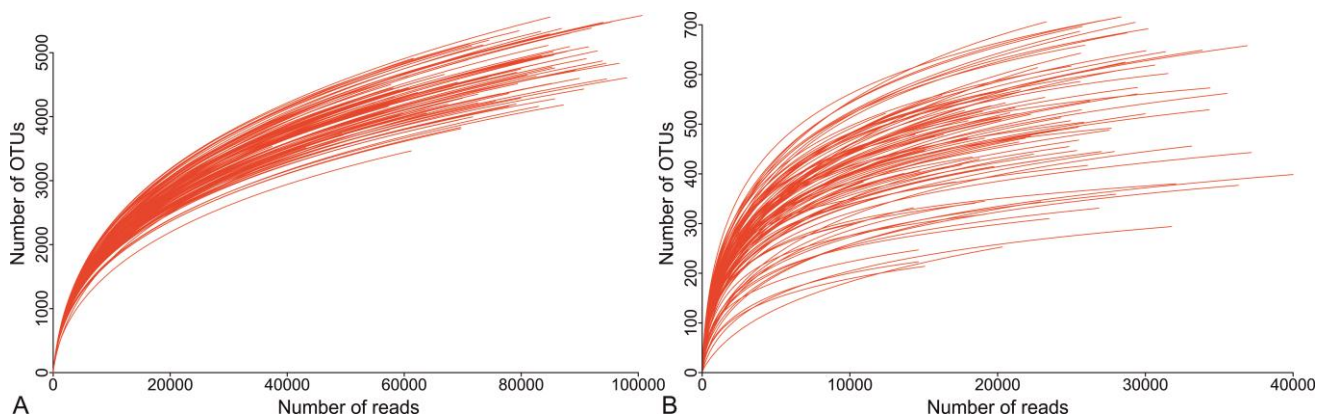

**Supplementary Figure S1.** Individual rarefaction curves of bacterial (A) and fungal (B) OTUs at a 97 % similarity level of all 104 soil samples.

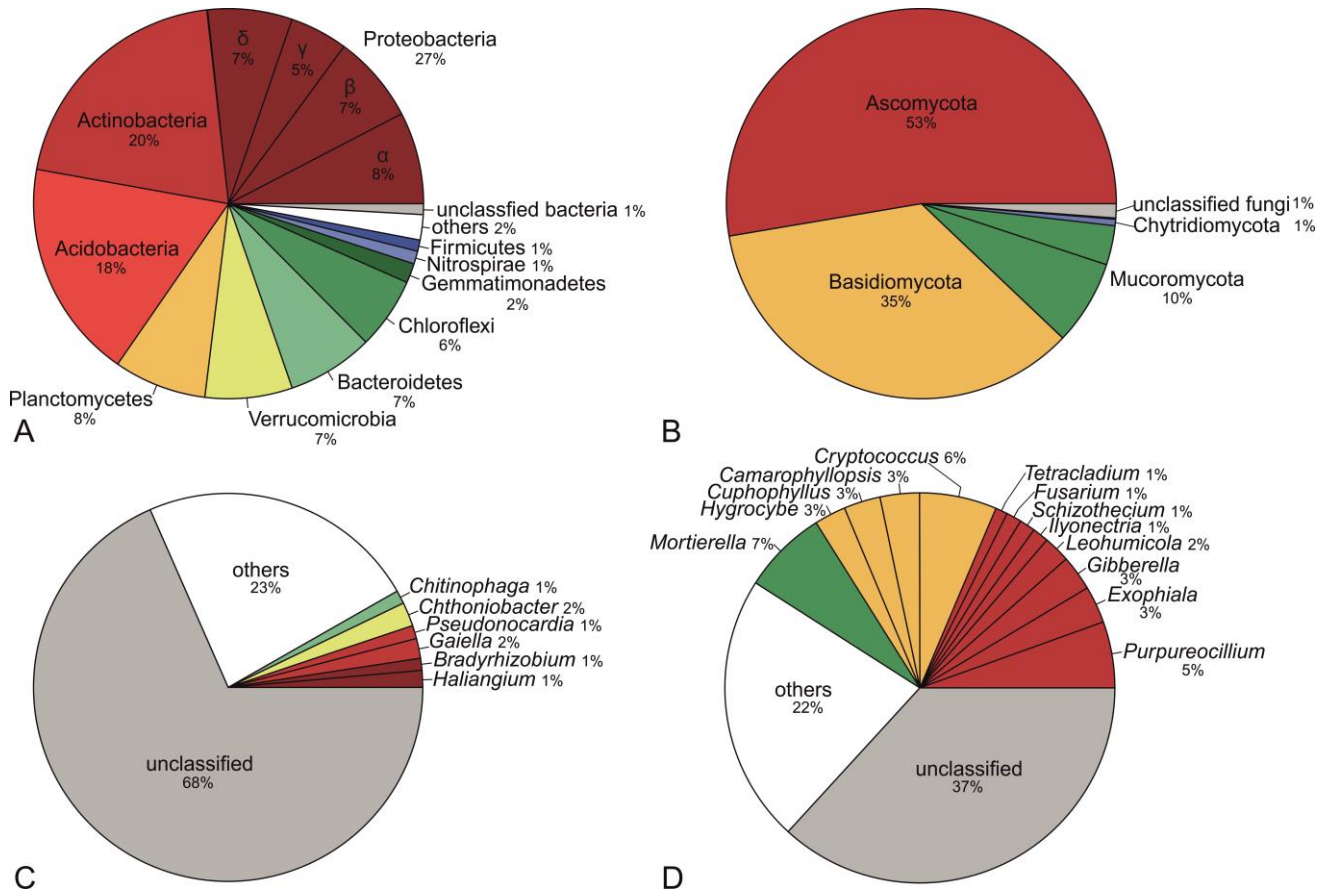

**Supplementary Figure S2.** Bacterial (A and C) and fungal (B and D) OTU relative abundances of the most abundant phyla and genera (i.e. with at least 1 % relative abundance). Phyla and genera with a relative OTU abundance less than 1% were grouped into “others”. (A) the proteobacterial phylum is broken down into classes. (B) Ascomycota fungi could be further divided into the growth morphological types ascomycetes mold (8 %), yeast fungi (4 %) and other ascomycetes (41 %) and Basidiomycota fungi into basidiomycetes yeast (7 %), agaricoid (7 %) and other basidiomycetes (21 %). Mucoromycota fungi (green) are mainly comprised of the subphyla Mortierellomycotina (7 %) and Glomeromycotina (3 %). (C and D) the color of an abundant bacterial or fungal genus corresponds to the respective color of the bacterial or fungal phylum.

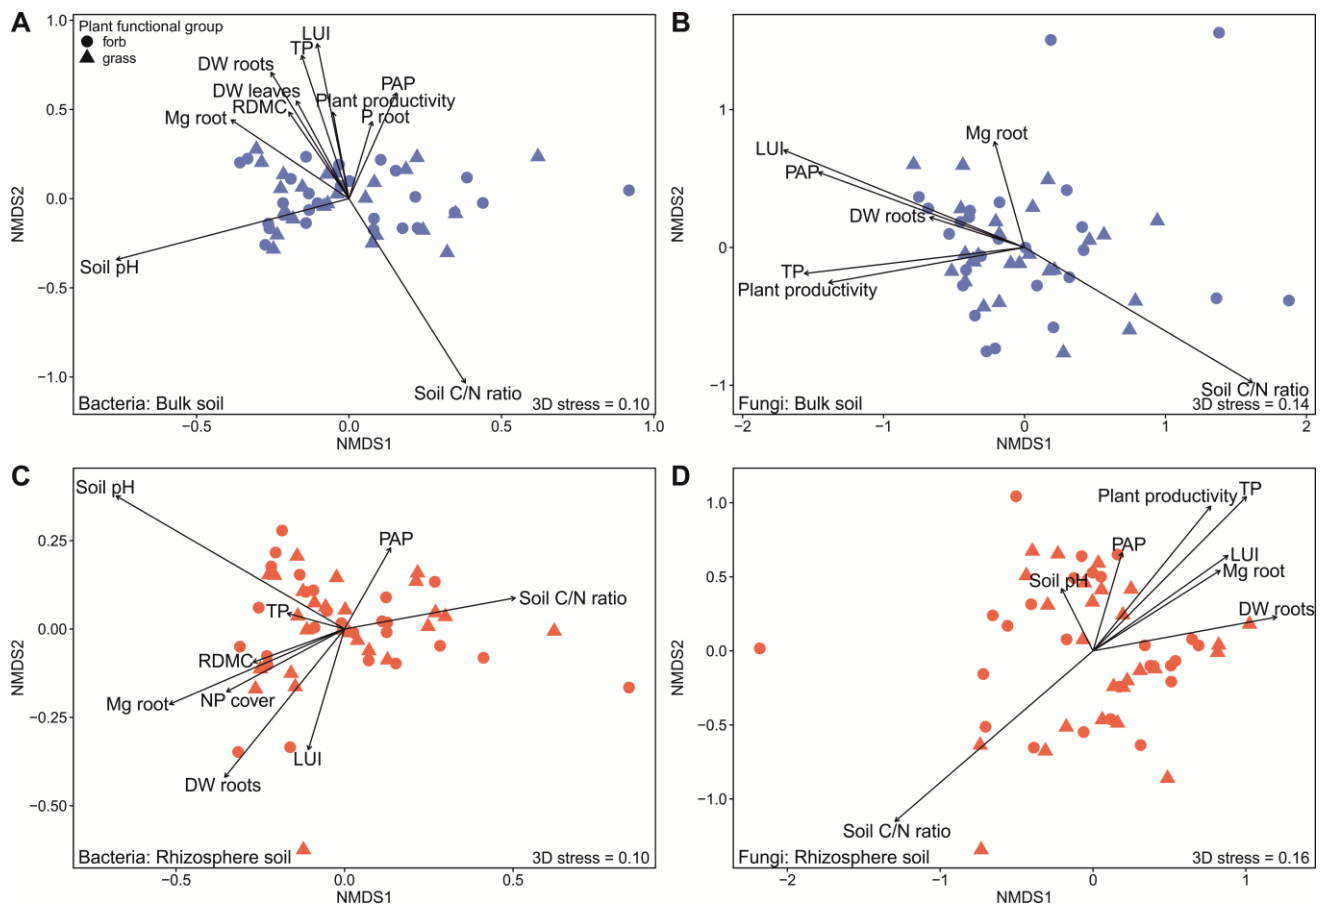

**Supplementary Figure S3.** Nonmetric multidimensional scaling (NMDS) ordination of bacterial (A and C) and fungal (B and D) community composition in bulk (blue) and rhizosphere (red) soil both under forbs (●) and grasses (▲) based on Bray-Curtis dissimilarity and  $k = 3$  dimensions. Significant vectors ( $p < 0.05$ ) correlated with community composition are shown. LUI, land-use intensity index; DW leaf/root, dry weight root/leaf; RDMC, root dry matter content; Mg root, root magnesium content; P root, root phosphorus content; Soil C/N ratio, soil carbon to nitrogen ratio; PAP, plant available phosphorus; TP, soil total phosphorus; Plant productivity, plant biomass per plot; NP cover, /cover of the neighboring plants.

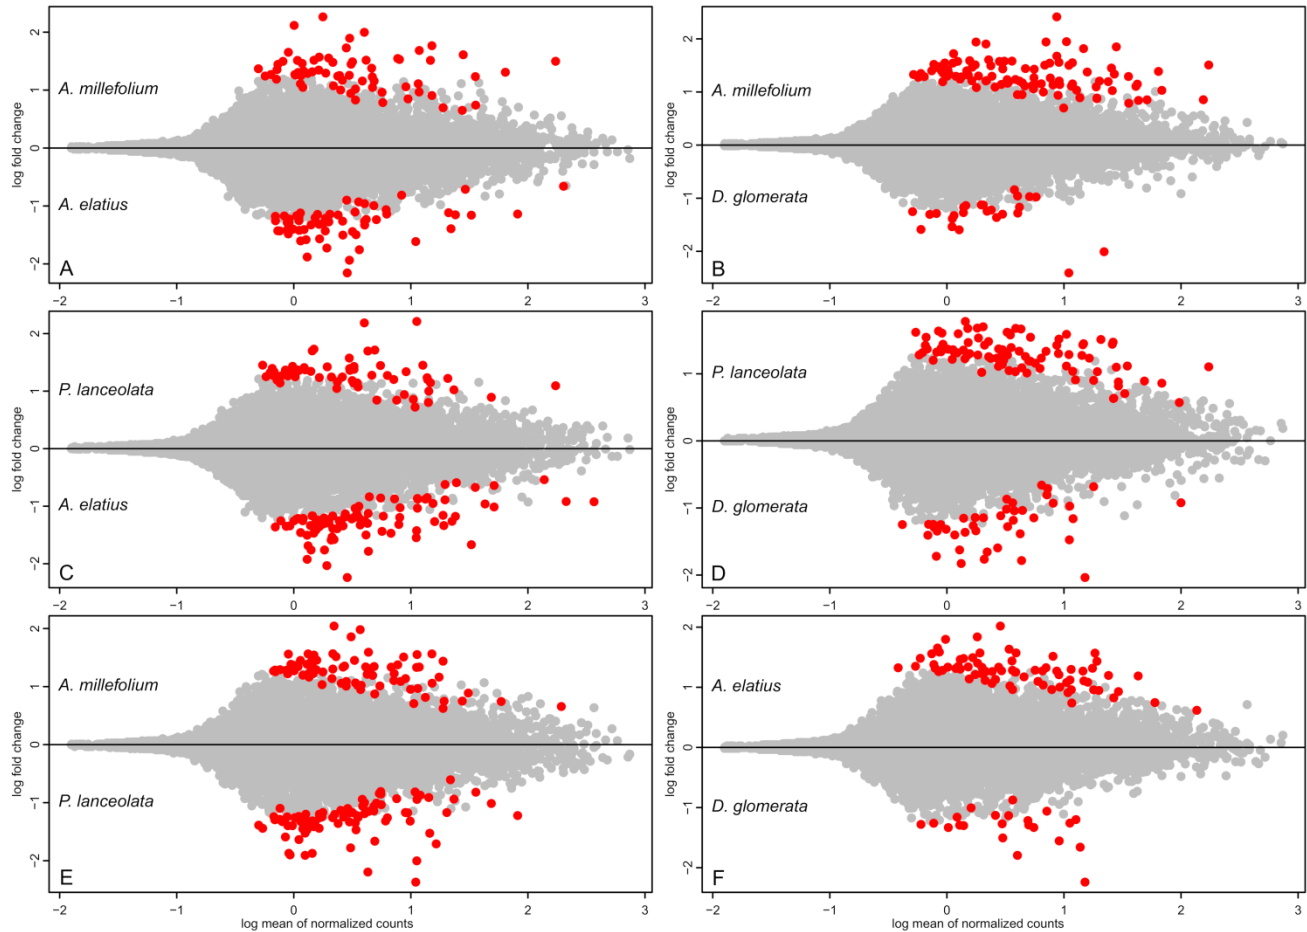

**Supplementary Figure S4.** Pairwise comparisons of the plant phytometer species in rhizosphere soil for bacterial OTUs. In each experimental plot, the shapes represent individual OTUs whose position on the x-axis reflects their abundance (normalized counts) and position on the y-axis represents the fold change in the indicated comparison. All bacterial OTUs significantly differentially represented between two plant species are highlighted (Wald test,  $p < 0.05$ ; all bacterial significantly different OTUs ( $p < 0.05$ ) are displayed with taxonomic affiliation in Supplementary Table S7).

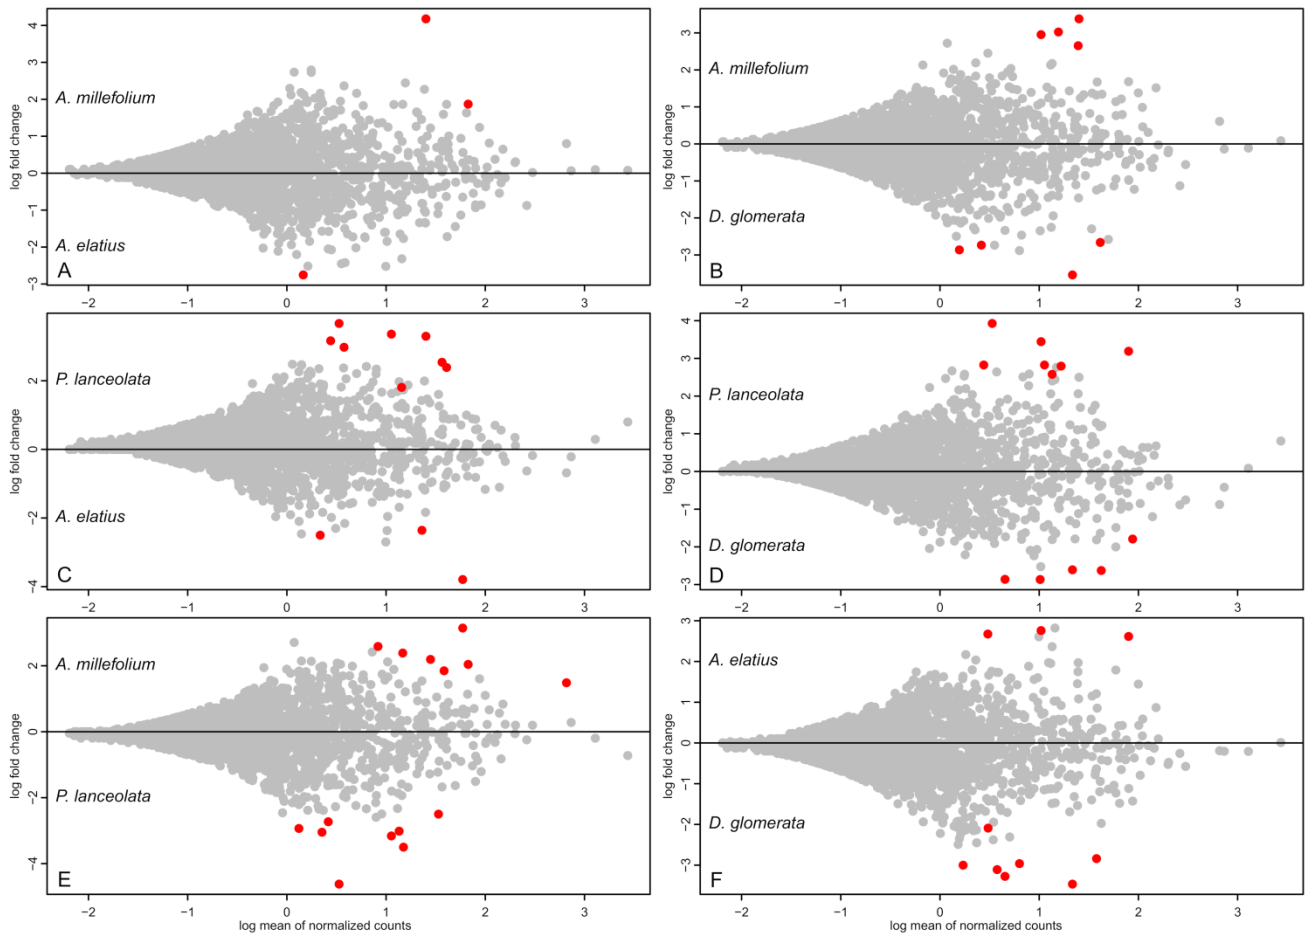

**Supplementary Figure S5.** Pairwise comparisons of the plant phytometer species in rhizosphere soil for fungal OTUs. In each experimental plot, the shapes represent individual OTUs whose position on the x-axis reflects their abundance (normalized counts) and position on the y-axis represents the fold change in the indicated comparison. All fungal OTUs significantly differentially represented between two plant species are highlighted (Wald test,  $p < 0.05$ ): all fungal significantly different OTUs ( $p < 0.05$ ) are displayed with taxonomic affiliation in Supplementary Table S7).

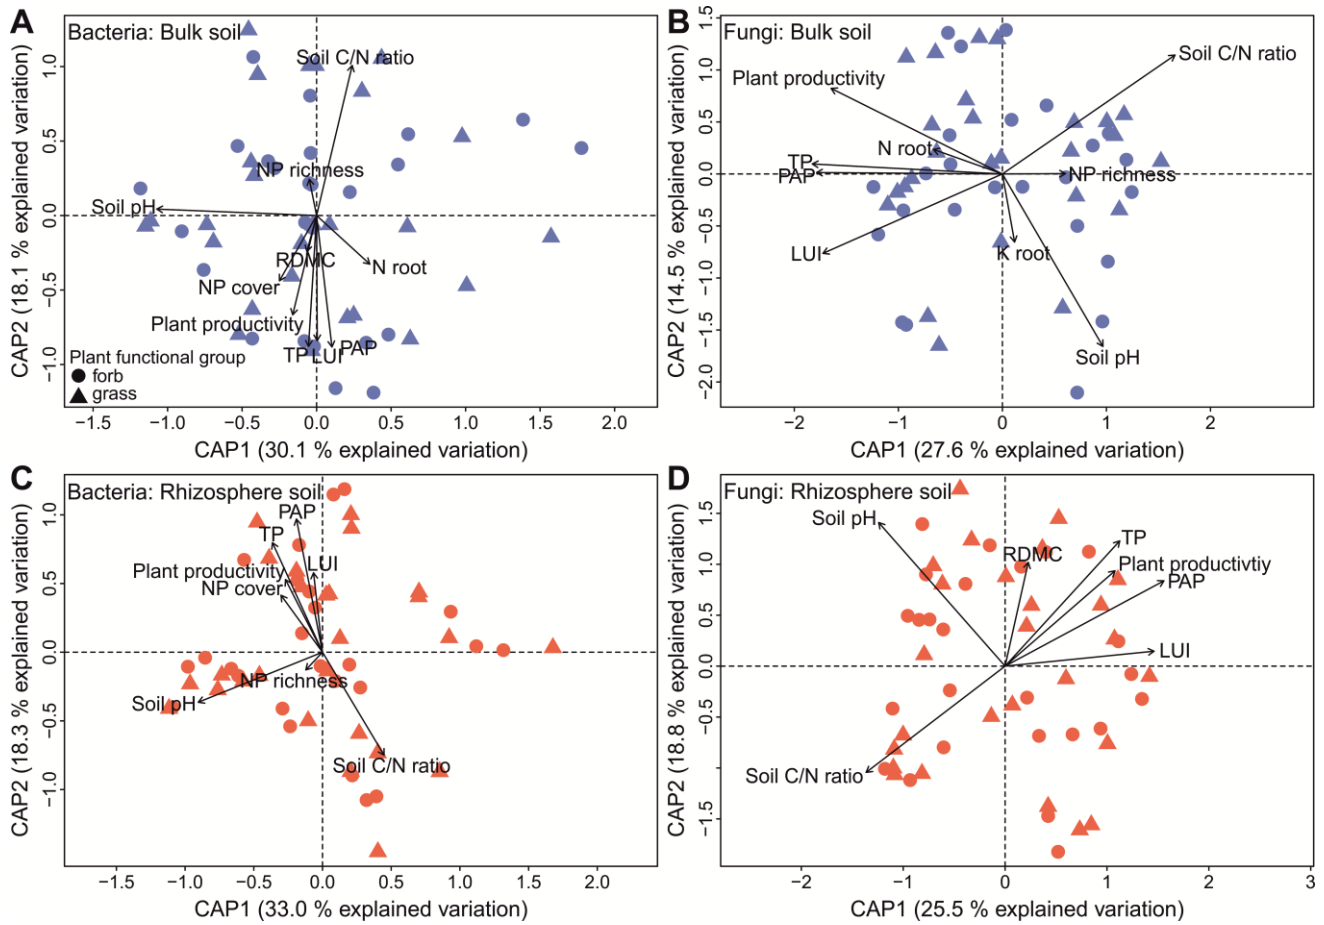

**Supplementary Figure S6.** Partial distance-based redundancy analysis (db-RDA) for the bacterial (A and C) and fungal (B and D) communities in the bulk and rhizosphere soil associated with the plant traits and environmental factors based on Bray-Curtis dissimilarity. LUI, land-use intensity index; RDMC, root dry matter content; N root, root nitrogen content; K root, root potassium content; Soil C/N ratio, soil carbon to nitrogen ratio; PAP, plant available phosphorus; TP, soil total phosphorus; Plant productivity, plant biomass per experimental plot; NP richness/cover, richness/cover of the neighboring plants.

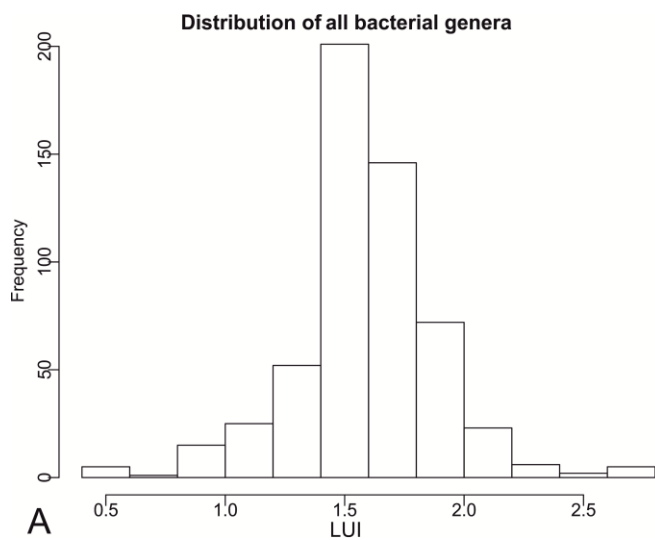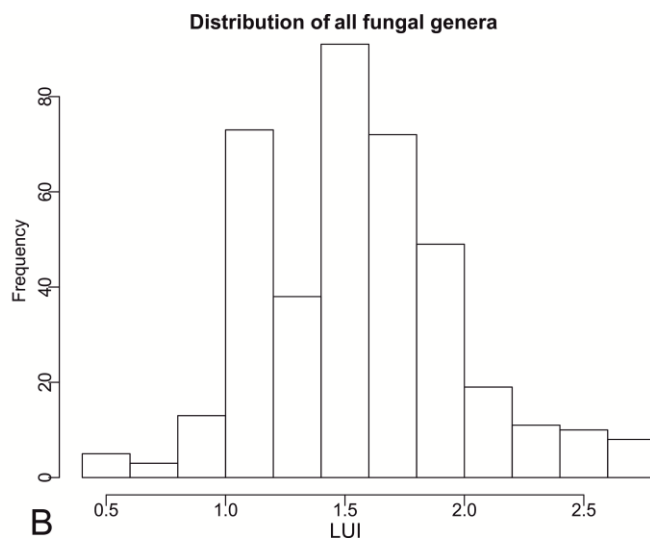

**A** **B**  
**Supplementary Figure S7.** Histogram showing frequency in abundance-weighted mean LUI of all 553 bacterial (A) and 393 fungal (B) genera.

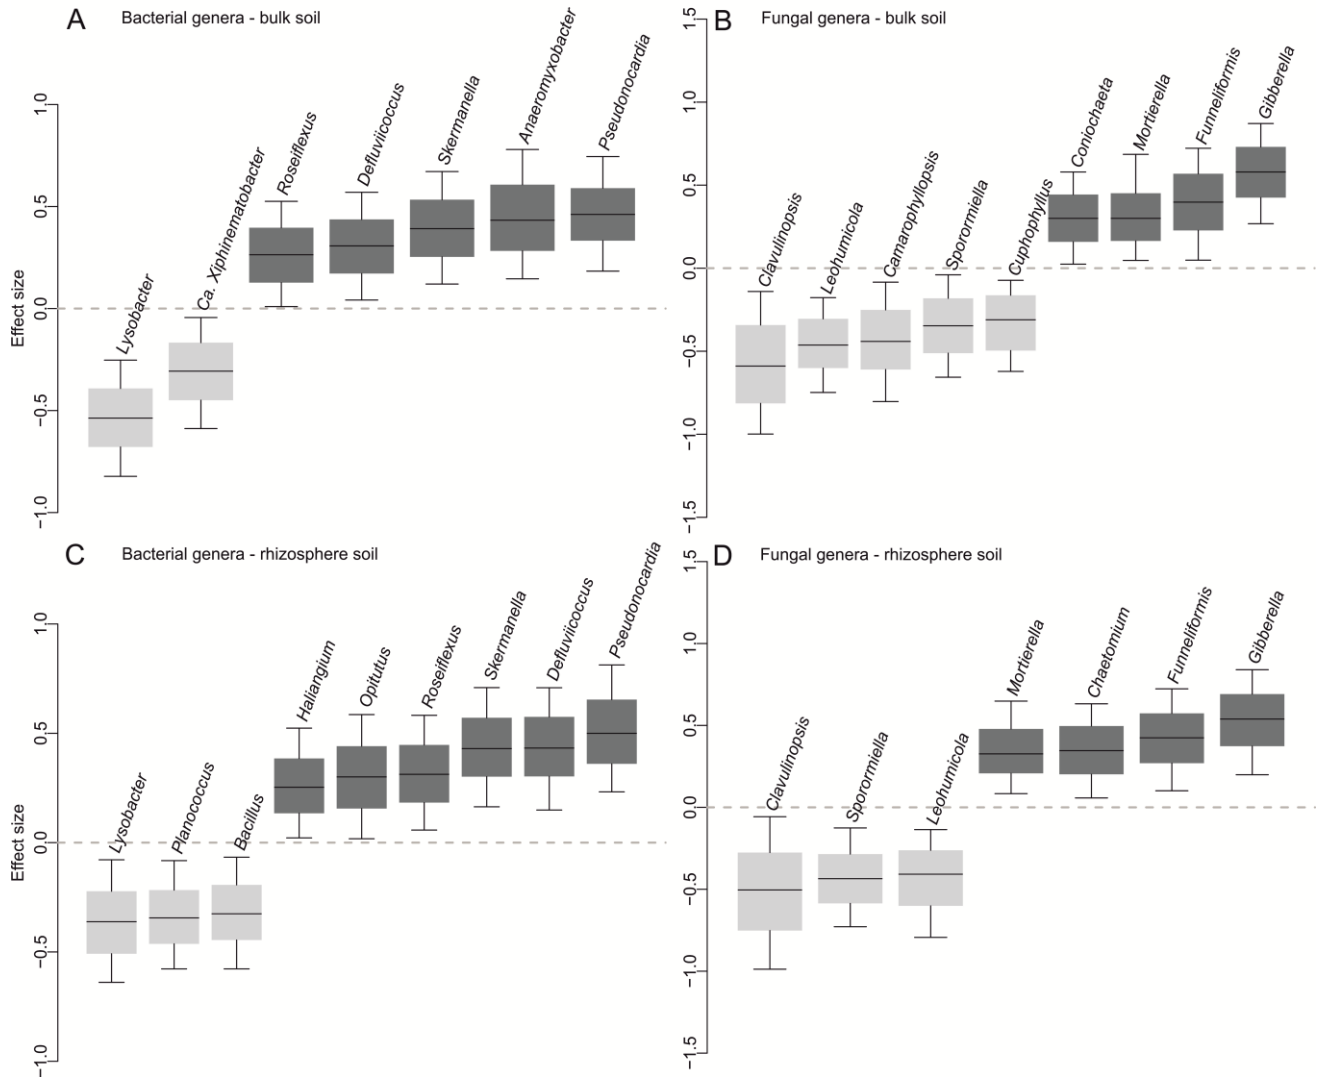

**Supplementary Figure S8.** Coefficient plots of the generalized joint attribute modeling (gjam) analysis. Effect of land-use intensity (LUI) index on the composition count data of the top ranked bacterial (A-C) and fungal (B-D) genera from the SIMPER analysis with the strongest response to LUI. Posterior distributions for microbial genera responses to LUI are well identified, with narrow 95 % credible intervals; genera indicated in dark grey exhibited a strong positive and light grey a strong negative response to LUI.



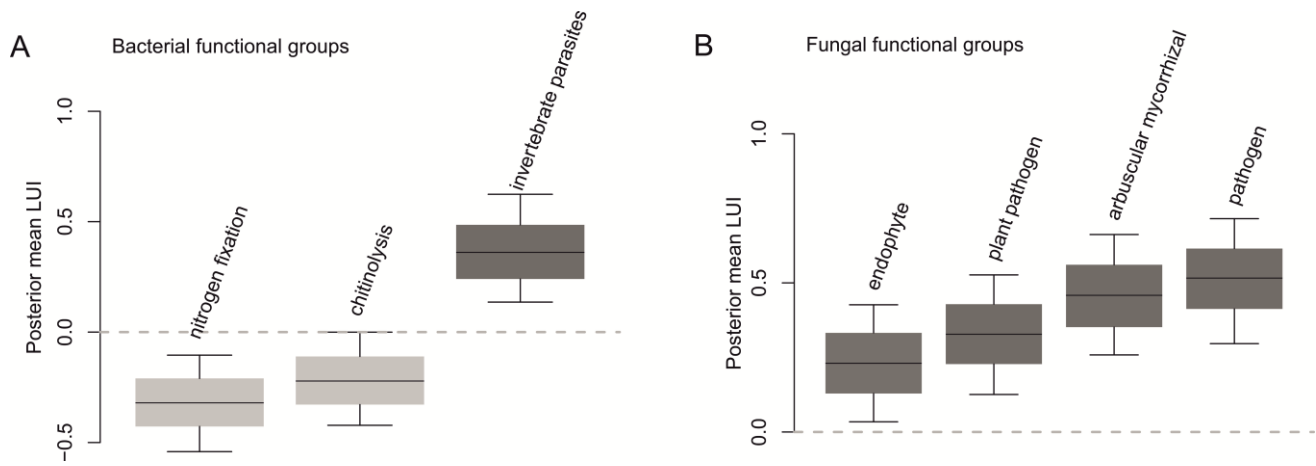

**Supplementary Figure S9.** Coefficient plots of the generalized joint attribute modeling (gjam) analysis. Relative abundances of bacterial (A) and fungal (B) functional groups in response to land-use intensity (LUI) index were tested and functional groups with a strong response are shown. Posterior distributions for microbial functional groups responses to LUI are well identified, with narrow 95 % credible intervals; functional groups indicated in dark grey exhibited a strong positive and light grey a strong negative response to LUI.

## 1.2 Supplementary Tables

**Supplementary Table S1.** Values of environmental variables in each experimental plot. LUI, land-use intensity index of 2014; Soil pH, pH of soil; Soil C/N ratio, soil carbon to nitrogen ratio; PAP, plant-available NaHCO<sub>3</sub>-extractable phosphorus; TP, total soil phosphorus concentration; Plant productivity, plant biomass per experimental plot.

| <i>Plot</i>  | <i>LUI</i> | <i>Soil pH</i> | <i>Soil C/N ratio</i> | <i>PAP</i> | <i>TP</i> | <i>Plant productivity</i> | <i>Management</i> | <i>Treatment</i> | <i>Soil type</i> |
|--------------|------------|----------------|-----------------------|------------|-----------|---------------------------|-------------------|------------------|------------------|
| <i>HEG01</i> | 2.530      | 6.520          | 9.882                 | 22.987     | 1.030     | 511.100                   | mown pasture      | fertilized       | Cambisol         |
| <i>HEG03</i> | 2.660      | 7.100          | 8.910                 | 16.789     | 1.230     | 340.650                   | mown pasture      | fertilized       | Vertisol         |
| <i>HEG05</i> | 2.150      | 6.920          | 9.586                 | 14.761     | 0.770     | 230.350                   | mown pasture      | fertilized       | Stagnosol        |
| <i>HEG09</i> | 0.930      | 6.770          | 11.109                | 9.938      | 0.580     | 241.850                   | pasture           | non-fertilized   | Stagnosol        |
| <i>HEG14</i> | 1.840      | 6.360          | 10.745                | 18.686     | 1.250     | 431.450                   | mown pasture      | fertilized       | Stagnosol        |
| <i>HEG16</i> | 1.060      | 6.830          | 10.098                | 12.944     | 1.150     | 331.550                   | pasture           | non-fertilized   | Stagnosol        |
| <i>HEG21</i> | 0.580      | 7.090          | 10.043                | 30.048     | 0.910     | 218.200                   | pasture           | non-fertilized   | Stagnosol        |
| <i>HEG26</i> | 1.750      | 7.170          | 10.058                | 12.386     | 0.820     | 229.750                   | meadow            | fertilized       | Cambisol         |
| <i>HEG27</i> | 1.710      | 7.140          | 10.107                | 13.023     | 1.110     | 481.400                   | meadow            | fertilized       | Cambisol         |
| <i>HEG33</i> | 1.560      | 5.010          | 10.499                | 47.416     | 0.490     | 234.100                   | mown pasture      | fertilized       | Cambisol         |
| <i>HEG40</i> | 1.590      | 6.550          | 9.642                 | 39.949     | 1.320     | 280.750                   | pasture           | non-fertilized   | Cambisol         |
| <i>HEG41</i> | 1.100      | 7.060          | 11.174                | 7.829      | 0.710     | 249.600                   | pasture           | non-fertilized   | Cambisol         |
| <i>HEG42</i> | 1.060      | 7.100          | 10.723                | 13.874     | 0.660     | 109.800                   | pasture           | non-fertilized   | Cambisol         |

**Supplementary Table S2.** Information about the plant traits, plot variables and local neighborhood vegetation used. The last column shows the plant traits and plot variables used for the variation partitioning. NP richness/cover, richness/cover of the neighboring plants.

| <i>Abbreviation</i>       | <i>Unit</i>      | <i>Description</i>                                     | <i>Predictor type</i> |
|---------------------------|------------------|--------------------------------------------------------|-----------------------|
| <i>DW leaves</i>          | mg               | Dry mass                                               | Plant trait           |
| <i>DW shoots</i>          | g                | Dry mass                                               | Plant trait           |
| <i>DW roots</i>           | g                | Dry mass                                               | Plant trait           |
| <i>RDMC</i>               | mg/g             | Root dry mass per root fresh mass                      | Plant trait           |
| <i>Rvol</i>               | cm <sup>3</sup>  | Root volume                                            | Plant trait           |
| <i>Root C</i>             | %                | Root carbon concentration                              | Plant trait           |
| <i>Root N</i>             | %                | Root nitrogen concentration                            | Plant trait           |
| <i>Root P</i>             | μmol/g           | Root phosphorus concentration                          | Plant trait           |
| <i>Root Mg</i>            | μmol/g           | Root magnesium concentration                           | Plant trait           |
| <i>Root Ca</i>            | μmol/g           | Root calcium concentration                             | Plant trait           |
| <i>Root K</i>             | μmol/g           | Root potassium concentration                           | Plant trait           |
| <i>LUI</i>                |                  | Land-use intensity index                               | Plot variable         |
| <i>Soil pH</i>            |                  | pH of soil                                             | Plot variable         |
| <i>Soil C/N ratio</i>     |                  | Soil carbon to nitrogen ratio                          | Plot variable         |
| <i>PAP</i>                | mg/kg            | Plant available phosphorus concentration               | Plot variable         |
| <i>TP</i>                 | g/kg             | Total soil phosphorus concentration                    | Plot variable         |
| <i>Plant productivity</i> | g/m <sup>2</sup> | Weight of dried biomass                                | Plot variable         |
| <i>NP richness</i>        |                  | Plant species richness measured around each phytometer |                       |
| <i>NP cover</i>           | %                | Grass and herb cover around each phytometer            |                       |

**Supplementary Table S3.** An XLSX table contains bacterial and fungal genera that contribute to the observed difference in the bacterial and fungal communities of the bulk and rhizosphere soil assemblages based on similarity percentage (SIMPER) analysis.

**Supplementary Table S4.** An XLSX table contains Spearman's rank correlation matrix and correlation significance of relevant variables.

**Supplementary Table S5.** Diversity indices for bacterial and fungal communities in bulk (BS) and rhizosphere soil (RS). Significant differences between soil compartments are indicated by lowercase letters according to Tukey HSD post hoc test ( $p < 0.05$ ). Abundance-based coverage estimator (ACE).

| <i>Diversity indices</i> | <i>Bacteria</i>                       |                                       | <i>Fungi</i>                        |                                     |
|--------------------------|---------------------------------------|---------------------------------------|-------------------------------------|-------------------------------------|
|                          | <i>BS</i>                             | <i>RS</i>                             | <i>BS</i>                           | <i>RS</i>                           |
| <i>Richness</i>          | 2925.08 ( $\pm 228.93$ ) <sup>b</sup> | 3073.86 ( $\pm 214.94$ ) <sup>a</sup> | 335.21 ( $\pm 81.62$ ) <sup>b</sup> | 407.85 ( $\pm 63.70$ ) <sup>a</sup> |
| <i>Shannon diversity</i> | 6.79 ( $\pm 0.12$ ) <sup>b</sup>      | 6.86 ( $\pm 0.15$ ) <sup>a</sup>      | 3.70 ( $\pm 0.90$ ) <sup>a</sup>    | 3.91 ( $\pm 0.65$ ) <sup>a</sup>    |
| <i>Evenness</i>          | 0.85 ( $\pm 0.01$ ) <sup>a</sup>      | 0.86 ( $\pm 0.01$ ) <sup>a</sup>      | 0.63 ( $\pm 0.14$ ) <sup>a</sup>    | 0.65 ( $\pm 0.10$ ) <sup>a</sup>    |
| <i>ACE</i>               | 3310.29 ( $\pm 279.78$ ) <sup>b</sup> | 3491.13 ( $\pm 262.54$ ) <sup>a</sup> | 361.81 ( $\pm 87.54$ ) <sup>b</sup> | 446.72 ( $\pm 70.73$ ) <sup>a</sup> |

**Supplementary Table S6.** Results of the LMEM for OTU richness and ACE of bacteria and fungi. For the response variables bacterial and fungal OTU richness and abundance-based coverage estimator (ACE), the model with the lowest AICc is shown (where no significant interactions were found). The full model contained soil compartment, land-use intensity (LUI) and plant functional group (PFG)/plant species (PS) as fixed factors, as well as all possible interactions. Experimental plot and soil type were random factors. There were 104 observations. Marginal  $R^2$  indicates how much variance is explained in the model without random factors, conditional  $R^2$  is how much variance is explained by the model including random factors. \*\*\* $p < 0.001$ ; n.s., not significant.

| <i>LMEM – PFG</i>                | <i>Bacteria</i>         |          |                         |          | <i>Fungi</i>          |          |                       |          |
|----------------------------------|-------------------------|----------|-------------------------|----------|-----------------------|----------|-----------------------|----------|
|                                  | <i>Richness</i>         |          | <i>ACE</i>              |          | <i>Richness</i>       |          | <i>ACE</i>            |          |
|                                  | <i>Estimate</i>         | <i>p</i> | <i>Estimate</i>         | <i>p</i> | <i>Estimate</i>       | <i>p</i> | <i>Estimate</i>       | <i>p</i> |
| <i>Intercept</i>                 | 2853.79                 | ***      | 3238.73                 | ***      | 322.984               | ***      | 349.563               | ***      |
| <i>Soil compartment</i>          | 148.79                  | ***      | 180.84                  | ***      | 72.635                | ***      | 84.905                | ***      |
| <i>LUI</i>                       | 36.06                   | n.s.     | 32.36                   | n.s.     | 3.318                 | n.s.     | 3.108                 | n.s.     |
| <i>Grasses</i>                   | 28.71                   | n.s.     | 40.96                   | n.s.     | 13.981                | n.s.     | 14.685                | n.s.     |
| <i>R<sup>2</sup> marginal</i>    | 0.12                    |          | 0.11                    |          | 0.21                  |          | 0.23                  |          |
| <i>R<sup>2</sup> conditional</i> | 0.39                    |          | 0.43                    |          | 0.50                  |          | 0.53                  |          |
| <i>Pairwise comparison</i>       | Mean ± SD               |          | Mean ± SD               |          | Mean ± SD             |          | Mean ± SD             |          |
| <i>Bulk soil</i>                 | 2925 ± 228 <sup>b</sup> |          | 3310 ± 280 <sup>b</sup> |          | 337 ± 82 <sup>b</sup> |          | 362 ± 88 <sup>b</sup> |          |
| <i>Rhizosphere soil</i>          | 3073 ± 215 <sup>a</sup> |          | 3491 ± 263 <sup>a</sup> |          | 410 ± 64 <sup>a</sup> |          | 447 ± 71 <sup>a</sup> |          |
| <i>LMEM – PS</i>                 | <i>Bacteria</i>         |          |                         |          | <i>Fungi</i>          |          |                       |          |
|                                  | <i>Richness</i>         |          | <i>ACE</i>              |          | <i>Richness</i>       |          | <i>ACE</i>            |          |
|                                  | <i>Estimate</i>         | <i>p</i> | <i>Estimate</i>         | <i>p</i> | <i>Estimate</i>       | <i>p</i> | <i>Estimate</i>       | <i>p</i> |
| <i>Intercept</i>                 | 2843.41                 | ***      | 3220.12                 | ***      | 328.369               | ***      | 355.09                | ***      |
| <i>Soil compartment</i>          | 148.79                  | ***      | 180.84                  | ***      | 72.635                | ***      | 84.905                | ***      |
| <i>LUI</i>                       | 36.06                   | n.s.     | 32.36                   | n.s.     | 3.318                 | n.s.     | 3.108                 | n.s.     |
| <i>Species_Plan.lanc</i>         | 20.77                   | n.s.     | 37.22                   | n.s.     | -10.769               | n.s.     | -11.054               | n.s.     |
| <i>Species_Arrh.elat</i>         | 19.08                   | n.s.     | 33.74                   | n.s.     | 11.346                | n.s.     | 13.018                | n.s.     |
| <i>Species_Dact.glom</i>         | 59.12                   | n.s.     | 85.39                   | n.s.     | 5.846                 | n.s.     | 5.297                 | n.s.     |
| <i>R<sup>2</sup> marginal</i>    | 0.12                    |          | 0.12                    |          | 0.21                  |          | 0.24                  |          |
| <i>R<sup>2</sup> conditional</i> | 0.40                    |          | 0.43                    |          | 0.51                  |          | 0.54                  |          |

**Supplementary Table S7.** An XLSX table contains two tables of all bacterial and fungal OTUs with significant fold change ( $p < 0.05$ ) between both plant functional groups (PFG) and the four plant species (PS). These tables correspond to Figure 6 as well as Supplementary Figure S3 and S4.
